# Supplementary material
Source: HighWire-hosted journal article supplement (https://www.rcpjournals.org/highwire/filestream/12499/field_highwire_adjunct_files/0/Tyson_supplementary_material_S1.pdf)
Supplement: Tyson_supplementary_material_S1.pdf [file Tyson_supplementary_material_S1.pdf]

## Pre-course questionnaire for students

### Questionnaire prior to paracentesis practical skills course

#### Year of training:

Please circle your answers,

**1= not confident      2= some confidence      3= confident      4= very confident**

1) Have you ever observed an ascitic drain being inserted?

**Yes                  No**

2) Do you feel that there are adequate opportunities to insert ascitic drains throughout your training?

**Yes                  No**

3) How many ascitic drains have you inserted yourself (either observed or unobserved):

**0-2                  3-5                  6-10                  >10**

4) How confident do you feel about inserting ascitic drains?

**1      2      3      4**

5) How confident do you feel about explaining ascitic drain insertion to a patient?

**1      2      3      4**

6) How confident do you feel about managing any potential complications?

**1      2      3      4**

7) How confident do you feel about knowing when to insert an ascitic drain, and in which patients?

**1      2      3      4**

8) How confident do you feel that ascitic drain insertion is taught well?

**1      2      3      4**

9) Do you have any concerns or worries about inserting ascitic drains?

**Yes                  No**

10) What do you hope to gain from taking this course?

11) Please add any other comments or thoughts you may have surrounding ascitic drain insertion/teaching of skills/performing practical skills in general/ or how you feel about inserting ascitic drains on the wards:

## Post course questionnaire for students

### Questionnaire post paracentesis practical skills course

#### **Year of training:**

Please circle your answers, the more detail the better please!

**1= detrimental 2= neither useful nor detrimental 3= useful 4= very useful**

1) Is this skills session generally useful for CMTs?

**1 2 3 4**

2) Were the slides on theory useful for your learning?

**1 2 3 4**

3) Was the practical session useful for your learning?

**1 2 3 4**

4) Did you learn anything new? **Please comment:**

5) What was the standard of the teaching?

**1 2 3 4**

6) Were the important topics covered adequately?

**Yes No Not Sure**

7) Was the session an appropriate length?

**Too short just right too long**

8) Has this course altered your confidence in insertion of ascitic drains?

**Less confident now Same level as before More confident than before**

9) How will this course impact on your future practice?

**Negative impact**

**No impact**

**Positive impact**

**1= not confident**

**2= some confidence**

**3= confident**

**4= very confident**

10) How confident do you feel about inserting ascitic drains?

**1      2      3      4**

11) How confident do you feel about explaining ascitic drain insertion to a patient?

**1      2      3      4**

12) How confident do you feel about managing any potential complications?

**1      2      3      4**

13) How confident do you feel about knowing when to insert an ascitic drain, and in which patients?

**1      2      3      4**

14) Can you suggest any improvements for the course style or content? Any other comments?
